# Supplementary material for: 3D fractional moving blood volume (3D-FMBV) demonstrates decreased first trimester placental vascularity in pre-eclampsia but not the term, small for gestation age baby
Source: PLoS One. 2017 Jun 1;12(6):e0178675. doi: 10.1371/journal.pone.0178675 (PMC5453560; doi:10.1371/journal.pone.0178675)
Supplement: S1 Dataset — (CSV) [file pone.0178675.s001.csv]

uID	Age	Smoking	Parity	Multipartious	BMI	IVF	AlcoholPregnancy	GestationalAge	CRL	IUGR	PET	PTL	PIH	PlaVol	sPlaV	FMBVUPI	FMBVIVS
1	24	0	1	0	30.5	0	0	89	64	1	1	1	1	14.9206	0.077711458	0.150127768	0.003615329
2	34	0	3	0	22.9	0	2	94	75	1	0	1	0	58.5371	0.260164889	0.145776704	0.064731277
3	27	1	2	0	26.2	0	2	95	75	0	0	1	0	77.4648	0.344288	0.505039927	0.146933931
4	32	0	0	1	23.1	0	4	85	59	0	0	1	0	51.7831	0.292559887	0.383647799	0.219084713
5	33	0	0	1	24.9	0	0	93	72	1	1	0	1	37.352	0.172925926	0.028181341	0.00228675
6	34	0	2	0	29.4	0	0	95	73	0	1	0	1	44.4548	0.202989954	0.049778216	0.023185622
7	39	0	2	0	21.3	0	0	89	64	1	1	0	1	25.5228	0.13293125	0.123615931	0.012901852
8	34	0	0	1	29.3	0	4	86	62	1	1	0	1	40.8031	0.219371505	0.047916667	0.013319636
9	38	0	2	0	23.6	0	2	96	81	1	1	0	1	74.0845	0.304874486	0.272239652	0.10738209
10	27	0	3	0	34.9	0	0	83	53	1	1	0	1	38.6646	0.243173585	0.046618516	0.027408671
11	33	1	2	0	29.8	0	0	87	63	0	1	0	1	31.6155	0.167277778	0.297911197	0.2926366
12	26	0	0	1	23.1	0	0	91	67	0	1	0	1	52.12	0.259303483	0.35040403	0.100697807
13	33	0	2	0	27.7	0	0	86	60	0	0	0	1	36.6801	0.203778333	0.239302919	0.219683595
14	25	0	0	1	31.7	0	0	90	63	0	0	0	1	62.6465	0.331462963	0.118604041	0.04137644
15	24	0	2	0	20.3	0	0	89	61	0	0	0	1	63.2317	0.345528415	0.174506958	0.075865223
16	24	1	1	0	28.9	0	0	91	75	0	0	0	1	86.6419	0.385075111	0.184248805	0.052119007
17	39	0	2	0	30.6	0	0	84	57	0	0	0	1	57.855	0.338333333	0.41389872	0.223237575
18	32	0	0	1	20.8	0	0	94	73	0	0	0	0	98.164	0.448237443	0.178786575	0.060384871
19	30	0	0	1	23.1	0	4	85	62	1	0	0	0	34.8339	0.187279032	0.114082969	0.027076116
20	32	0	0	1	20.3	0	0	84	56	0	0	0	0	42.5685	0.253383929	0.140825785	0.078859236
21	31	0	4	0	21.6	0	0	95	78	1	0	0	0	37.2515	0.159194444	0.275872443	0.088556283
22	31	0	0	1	24.3	0	0	92	73	0	0	0	0	107.465	0.490707763	0.198917765	0.191322216
23	34	0	1	0	21.2	0	0	93	78	0	0	0	0	89.5299	0.38260641	0.271455419	0.145493457
24	29	0	1	0	27.6	0	0	91	67	0	0	0	0	51.3783	0.255613433	0.307812722	0.06799424
25	22	0	0	1	24.3	0	0	90	71	0	0	0	0	46.6322	0.218930516	0.32721202	0.062758899
26	36	0	2	0	23	1	0	84	58	0	0	0	0	13.3662	0.076817241	0.147930118	0.025178441
27	25	0	1	0	27.8	0	0	84	58	0	0	0	0	32.9993	0.189651149	0.271040279	0.086436982
28	26	0	1	0	30.9	0	0	86	59	0	0	0	0	64.3772	0.363712994	0.127637289	0.086029201
29	29	0	0	1	22.5	0	0	97	78	0	0	0	0	115.547	0.493790598	0.208745795	0.074949435
30	29	0	0	1	20	0	0	92	70	0	0	0	0	72.7404	0.346382857	0.069445556	0.028246766
31	43	0	0	1	26.1	1	0	97	82	0	0	0	0	98.9102	0.402073984	0.140073361	0.094609418
32	30	0	0	1	23.3	0	0	85	58	0	0	0	0	54.0637	0.31071092	0.340785498	0.216499829
33	31	0	1	0	21.3	0	0	94	77	0	0	0	0	70.4741	0.305082684	0.31540519	0.155169245
34	27	1	2	0	20.7	0	0	88	65	0	0	0	0	62.1718	0.318829744	0.282377747	0.036733168
35	29	0	0	1	28.9	0	2	89	68	0	0	0	0	57.8402	0.283530392	0.221618357	0.047863977
36	33	0	0	1	24.7	1	0	92	76	0	0	0	0	82.7852	0.363092982	0.01993737	0.016118694
37	28	0	0	1	26	0	0	84	55	0	0	0	0	24.5513	0.148795758	0.183852785	0.043418377
38	27	0	0	1	25.6	0	0	84	57	0	0	0	0	40.9662	0.239568421	0.113066667	0.006819732
39	21	1	1	0	24.8	0	0	97	80	0	0	0	0	44.0947	0.183727917	0.178379187	0.07115528
40	28	0	2	0	28.7	0	4	86	64	1	0	0	0	33.8537	0.176321354	0.163107131	0.104163466
41	34	0	2	0	25.2	0	0	97	79	0	0	0	0	70.5894	0.29784557	0.307949183	0.10221843
42	35	0	0	1	27.7	1	0	90	60	0	0	0	0	59.9602	0.333112222	0.169895288	0.180986758
43	31	1	1	0	26	0	0	82	51	0	0	0	0	27.6183	0.180511765	0.38981204	0.199343724
44	16	0	0	1	20.4	0	0	90	64	1	0	0	0	57.6868	0.300452083	0.116694451	0.028177954
45	25	0	2	0	31.6	0	1	92	66	0	0	0	0	28.3845	0.143356061	0.006614694	0.000125384
46	37	0	1	0	20.5	0	0	96	82	0	0	0	0	113.878	0.462918699	0.268621701	0.159158202
47	35	0	1	0	28.4	0	0	96	81	0	0	0	0	72.4973	0.298342798	0.092319628	0.034559835
48	32	0	1	0	23.6	0	0	94	75	0	0	0	0	75.4853	0.335490222	0.501609334	0.362065151
49	37	0	1	0	26.5	0	8	93	67	0	0	0	0	38.2684	0.19039005	0.584256845	0.378098189
50	32	0	1	0	23.3	0	0	91	68	0	0	0	0	57.4478	0.281606863	0.284246971	0.164663814
51	24	1	0	1	32.7	0	0	84	60	0	0	0	0	14.6229	0.081238333	0.163772176	0.003345414
52	30	0	0	1	23.8	0	2	92	71	0	0	0	0	30.4229	0.142830516	0.100985573	0.024391136
53	22	0	0	1	28.5	0	0	97	83	0	0	0	0	109.197	0.438542169	0.183109866	0.091618587
54	36	0	1	0	33.2	0	2	95	81	1	0	0	0	69.2477	0.284969959	0.097658136	0.038047193
55	33	0	2	0	32.3	0	2	91	62	0	0	0	0	55.0998	0.296235484	0.319498735	0.114692808
56	29	0	0	1	21.5	1	0	93	73	0	0	0	0	60.5596	0.276527854	0.33580917	0.197822987
57	37	0	2	0	29.7	0	0	96	81	1	0	0	0	80.9611	0.333173251	0.179703742	0.019891231
58	22	1	1	0	23.6	0	0	97	78	0	0	0	0	62.746	0.268145299	0.275329928	0.129069645
59	25	0	0	1	21.3	0	0	95	71	0	0	0	0	53.3336	0.250392488	0.19132856	0.071783212
60	34	0	0	1	25.4	0	0	91	69	0	0	0	0	90.6139	0.437748309	0.225824109	0.085980549
61	32	0	0	1	20.6	0	0	94	78	0	0	0	0	78.4743	0.335360256	0.205160706	0.048538935
62	28	0	0	1	20.6	0	0	95	79	0	0	0	0	130.186	0.549308017	0.332887074	0.097131994
63	30	0	2	0	29	0	0	95	70	0	0	0	0	93.2087	0.443850952	0.196826688	0.139171115
64	37	0	1	0	22.5	0	1	97	83	1	0	0	0	94.9857	0.381468675	0.442207185	0.215778058
65	38	0	3	0	24.5	0	2	86	56	0	0	0	0	67.8668	0.403969048	0.396758651	0.212526597
66	23	0	0	1	20.1	0	8	96	78	0	0	0	0	63.8537	0.27287906	0.23036242	0.141880759
67	28	0	0	1	21.4	0	0	96	77	1	0	0	0	53.1107	0.22991645	0.169989066	0.021551444
68	22	1	1	0	22.7	0	0	87	57	0	0	0	0	50.9422	0.297907602	0.413543102	0.224872046
69	34	0	3	0	24.2	0	8	82	52	0	0	0	0	37.7383	0.241912179	0.17108865	0.061683089
70	39	0	2	0	23.5	0	2	85	56	0	0	0	0	53.4521	0.318167262	0.310377006	0.180058783
71	34	0	1	0	25.8	0	2	95	79	0	0	0	0	111.15	0.468987342	0.254861744	0.167614679
72	35	0	0	1	24.9	0	2	94	75	0	0	0	0	69.1537	0.307349778	0.114219653	0.055448071
73	40	0	0	1	19.5	0	0	97	82	0	0	0	0	81.4873	0.331249187	0.252393288	0.107720269
74	19	1	0	1	19.5	0	2	92	70	0	0	0	0	65.3905	0.311383333	0.154789557	0.038262645
75	29	0	0	1	23.2	0	0	91	73	0	0	0	0	80.1131	0.365813242	0.239176082	0.244396023
76	35	0	0	1	21.6	1	0	86	58	0	0	0	0	43.0177	0.247228161	0.534739275	0.239685295
77	28	0	1	0	23.7	0	0	84	58	0	0	0	0	40.5084	0.232806897	0.336022076	0.11370319
78	25	0	0	1	24.1	0	2	85	59	0	0	0	0	53.0903	0.299945198	0.282443801	0.146418191
79	31	0	0	1	27.9	0	1	92	73	0	0	0	0	48.2459	0.220300913	0.192799864	0.129332035
80	24	0	1	0	22	0	2	93	74	0	0	0	0	87.486	0.394081081	0.345669202	0.102994784
81	36	0	1	0	26.4	0	2	94	70	0	0	0	0	79.5705	0.378907143	0.284616387	0.14774174
82	25	0	0	1	17.8	0	18	97	79	0	0	0	0	61.7387	0.260500844	0.201184956	0.024520815
83	37	1	2	0	22.6	0	4	87	64	0	0	0	0	53.5512	0.2789125	0.408708415	0.045963857
84	35	0	1	0	29.4	0	1	87	62	0	0	0	0	40.8342	0.21953871	0.343973266	0.080366508
85	38	0	0	1	31.2	0	6	90	71	0	0	0	0	59.2324	0.278086385	0.429885573	0.06727063
86	39	0	1	0	25.9	0	0	91	71	0	0	0	0	55.8444	0.262180282	0.226983454	0.216820953
87	20	0	0	1	19.7	0	2	93	74	0	0	0	0	106.22	0.478468468	0.393114153	0.130753594
88	30	0	0	1	20.6	0	0	89	60	0	0	0	0	43.3867	0.241037222	0.338925784	0.085619144
89	44	0	0	1	21.9	1	0	89	69	0	0	0	0	54.6508	0.264013527	0.102689146	0.114329318
90	30	0	0	1	24.5	0	0	90	64	0	0	0	0	57.9055	0.301591146	0.187284377	0.088820464
91	36	0	1	0	20.7	0	2	93	69	0	0	0	0	65.7705	0.317731884	0.463088058	0.252405535
92	24	0	0	1	22.9	0	0	94	73	0	0	0	0	94.9737	0.433669863	0.225407235	0.091274752
93	37	0	1	0	30.5	0	0	97	83	0	0	0	0	120.473	0.483827309	0.351796976	0.131663716
94	38	0	0	1	25.7	0	2	87	66	0	0	0	0	52.9882	0.267617172	0.316564934	0.023631977
95	39	0	0	1	26.8	0	0	83	54	0	0	0	0	57.6411	0.355809259	0.219477935	0.114159553
96	37	0	1	0	21.4	0	0	96	71	0	0	0	0	84.6399	0.397370423	0.145675266	0.032766335
97	19	0	0	1	20	0	12	96	78	0	0	0	0	103.979	0.444354701	0.086583184	0.019262242
98	30	1	0	1	21.8	0	2	93	78	0	0	0	0	78.2206	0.334276068	0.278007075	0.161365513
99	26	1	1	0	20.1	0	0	86	63	0	0	0	0	52.3997	0.27724709	0.198359895	0.112914634
100	41	0	1	0	20.3	1	0	92	77	0	0	0	0	41.006	0.177515152	0.354771784	0.351909673
101	30	0	0	1	24.4	1	0	90	73	0	0	0	0	99.1072	0.452544292	0.297127906	0.139867709
102	23	0	1	0	26	0	0	95	77	0	0	0	0	58.6056	0.253703896	0.185908856	0.083021465
103	31	0	1	0	20	0	0	94	70	0	0	0	0	73.1548	0.34835619	0.46673323	0.16452214
104	44	0	0	1	21.5	1	3	92	76	0	0	0	0	67.4504	0.295835088	0.305980529	0.064836812
105	24	1	0	1	23.8	0	0	90	63	0	0	0	0	37.8145	0.20007672	0.20760389	0.074057578
106	30	0	0	1	23.8	0	2	87	59	0	0	0	0	48.5335	0.274200565	0.36947058	0.258829848
107	34	0	2	0	19.7	0	2	92	73	0	0	0	0	130.588	0.596292237	0.165205261	0.156603112
108	31	0	1	0	21.7	0	2	95	74	0	0	0	0	73.4845	0.331011261	0.273093614	0.146747544
109	29	0	1	0	19.3	0	0	93	70	0	0	0	0	46.0475	0.21927381	0.294878544	0.110120181
110	29	1	0	1	17.5	0	0	93	69	0	0	0	0	110.444	0.533545894	0.216070031	0.045027786
111	33	0	2	0	25.3	0	2	94	76	1	0	0	0	60.0588	0.263415789	0.481053771	0.205811341
112	21	1	1	0	26.8	0	2	87	60	0	0	0	0	36.8962	0.204978889	0.238003428	0.124293225
113	38	0	1	0	27.9	0	0	87	63	0	0	0	0	56.5983	0.299461905	0.296131409	0.039292798
114	29	0	0	1	25	0	0	93	74	0	0	0	0	62.3915	0.281042793	0.231675875	0.103245261
115	28	0	1	0	19.9	0	1	83	56	0	0	0	0	35.9463	0.213966071	0.365511412	0.157066977
116	29	0	0	1	20.7	0	0	92	71	0	0	0	0	65.1306	0.305777465	0.040378007	0.01225838
117	33	0	0	1	17.4	0	1	91	63	1	0	0	0	52.1333	0.275837566	0.090629275	0.099501799
118	25	0	1	0	21.6	0	0	85	58	0	0	0	0	45.36	0.260689655	0.220347063	0.155034135
119	30	0	0	1	22.1	1	0	95	79	0	0	0	0	95.2553	0.401921097	0.466413963	0.364392087
120	26	1	0	1	17.5	0	0	83	57	1	0	0	0	26.2881	0.153731579	0.055852771	0.016117354
121	29	0	1	0	21.9	0	0	84	56	0	0	0	0	35.7602	0.212858333	0.13009009	0.09556491
122	28	0	2	0	22.6	0	0	89	75	0	0	0	0	83.8723	0.372765778	0.654015253	0.441610623
123	33	0	0	1	20.5	0	0	97	79	1	0	0	0	78.9721	0.333215612	0.28144276	0.196407186
124	33	0	3	0	19.9	0	1	86	58	0	0	0	0	46.1839	0.265424713	0.205383023	0.071327137
125	32	0	0	1	32	0	0	86	57	0	0	0	0	44.4051	0.259678947	0.093613066	0.023584706
126	27	1	0	1	27	0	4	87	64	0	0	0	0	76.6627	0.399284896	0.258228073	0.246939143
127	21	1	0	1	27.4	0	0	85	64	0	0	0	0	112.936	0.588208333	0.07665996	0.027925744
128	18	1	0	1	31.9	0	0	91	66	0	0	0	0	66.6128	0.336428283	0.108141494	0.038191489
129	29	0	0	1	21	0	14	89	65	0	0	0	0	45.939	0.235584615	0.090886329	0.04144419
130	25	0	2	0	28.4	0	0	93	68	1	0	0	0	46.106	0.226009804	0.571907329	0.393824095
131	30	0	0	1	24.1	0	2	94	66	0	0	0	0	49.6643	0.250829798	0.36037249	0.31751794
132	39	0	1	0	28.7	0	1	94	84	0	0	0	0	85.3045	0.338509921	0.170208376	0.109104304
133	34	0	0	1	24.2	0	2	94	77	0	0	0	0	69.904	0.302614719	0.221610805	0.097373423
134	37	0	1	0	26.8	0	0	95	80	0	0	0	0	76.5847	0.319102917	0.433360927	0.187746827
135	25	0	1	0	21.9	0	2	88	63	0	0	0	0	55.6967	0.294691534	0.430141771	0.335723364
136	36	0	0	1	20.2	0	0	96	80	0	0	0	0	64.8545	0.270227083	0.379269926	0.304790875
137	31	0	1	0	23.9	0	2	91	72	0	0	0	0	67.9207	0.314447685	0.493789072	0.116883951
138	35	0	0	1	27.4	0	0	92	72	0	0	0	0	49.0544	0.227103704	0.406490032	0.043793598
139	29	0	0	1	21.3	0	2	93	73	0	0	0	0	98.8263	0.451261644	0.091085389	0.043354815
140	35	0	0	1	21.9	0	12	96	78	0	0	0	0	93.8136	0.400912821	0.133037284	0.047252479
141	21	1	0	1	18.1	0	0	90	68	0	0	0	0	28.8826	0.141581373	0.040412204	0.002096018
142	20	0	0	1	25.5	0	0	93	68	0	0	0	0	54.711	0.268191176	0.372718221	0.141971937
143	24	1	1	0	22.9	0	2	85	55	0	0	0	0	54.5841	0.330812727	0.148948982	0.136552574
